# Supplementary material for: Exposure to landscape fire smoke reduced birthweight in low- and middle-income countries: findings from a siblings-matched case-control study
Source: eLife journal article supplement (doi:10.7554/elife.69298), 2021-09-29
Supplement: supp [file elife-69298-supp-v1.zip]

Archive with 7 entries (7 files):
- elife_poa_e69298_Supplementary_file_1.docx
- elife_poa_e69298_Source_Code_File.zip
- elife_poa_e69298_Transparent_Reporting_File.docx
- elife_poa_e69298_Figure_2_figure_supplement_1.pdf
- elife_poa_e69298_Figure_2_figure_supplement_2.pdf
- elife_poa_e69298_Figure_2_figure_supplement_3.pdf
- elife_poa_e69298_Figure_4_figure_supplement_1.pdf
