# Supplementary figures and images for: Exposure to landscape fire smoke reduced birthweight in low- and middle-income countries: findings from a siblings-matched case-control study
Source: eLife journal article supplement (doi:10.7554/elife.69298), 2021-09-29

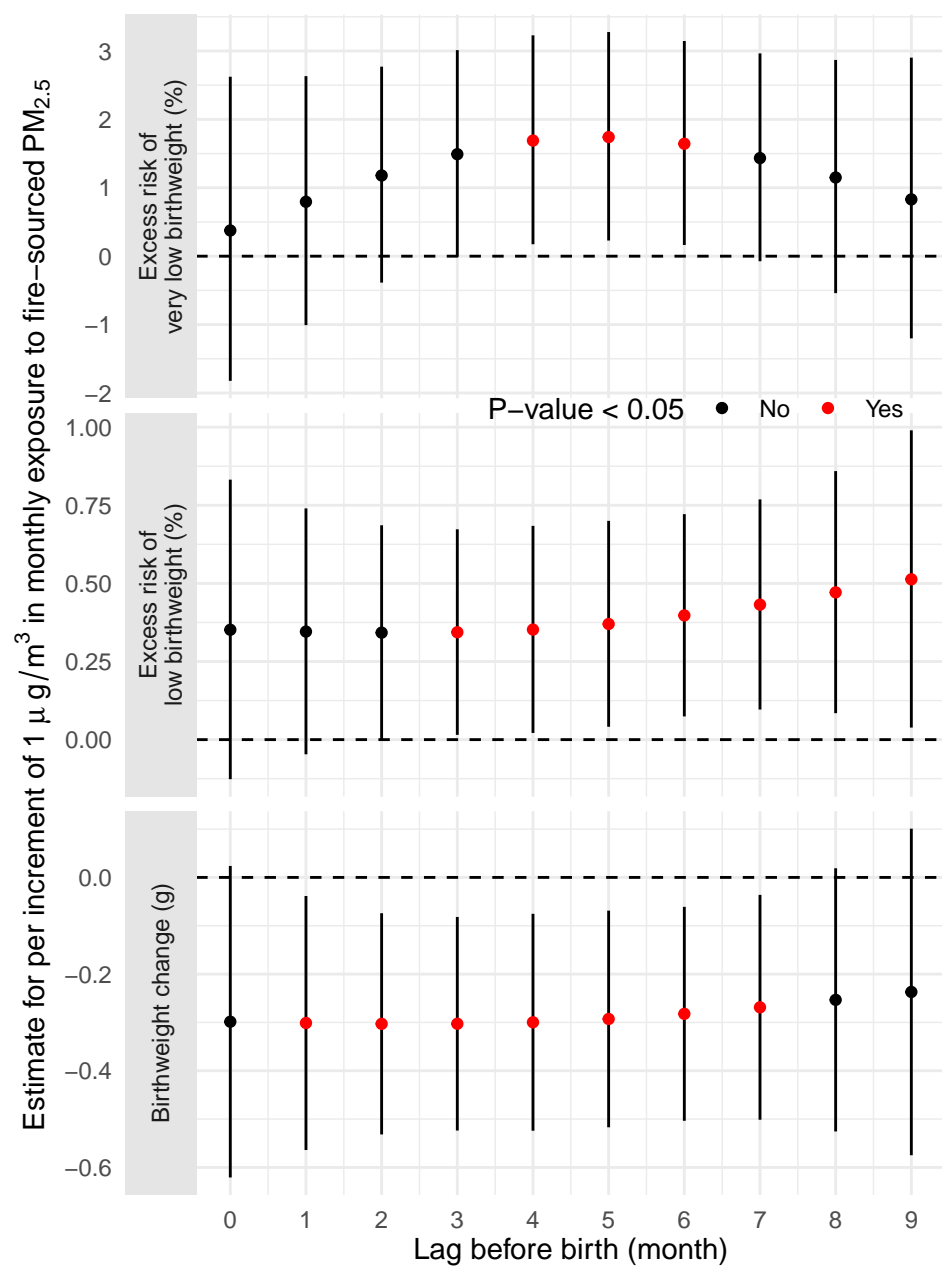

Supplement: supp [file elife-69298-supp-v1.zip › elife_poa_e69298_Figure_2_figure_supplement_1.pdf]

Cumulative birthweight change (g)

for per increment of  $1 \mu\text{g}/\text{m}^3$  in fire-sourced  $\text{PM}_{2.5}$

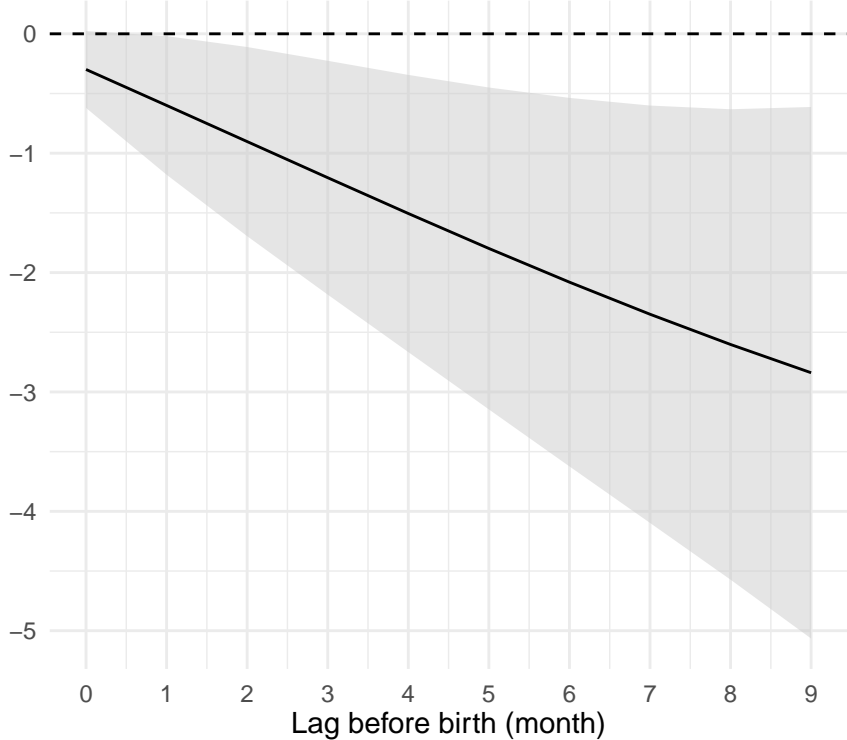

Supplement: supp [file elife-69298-supp-v1.zip › elife_poa_e69298_Figure_2_figure_supplement_2.pdf]

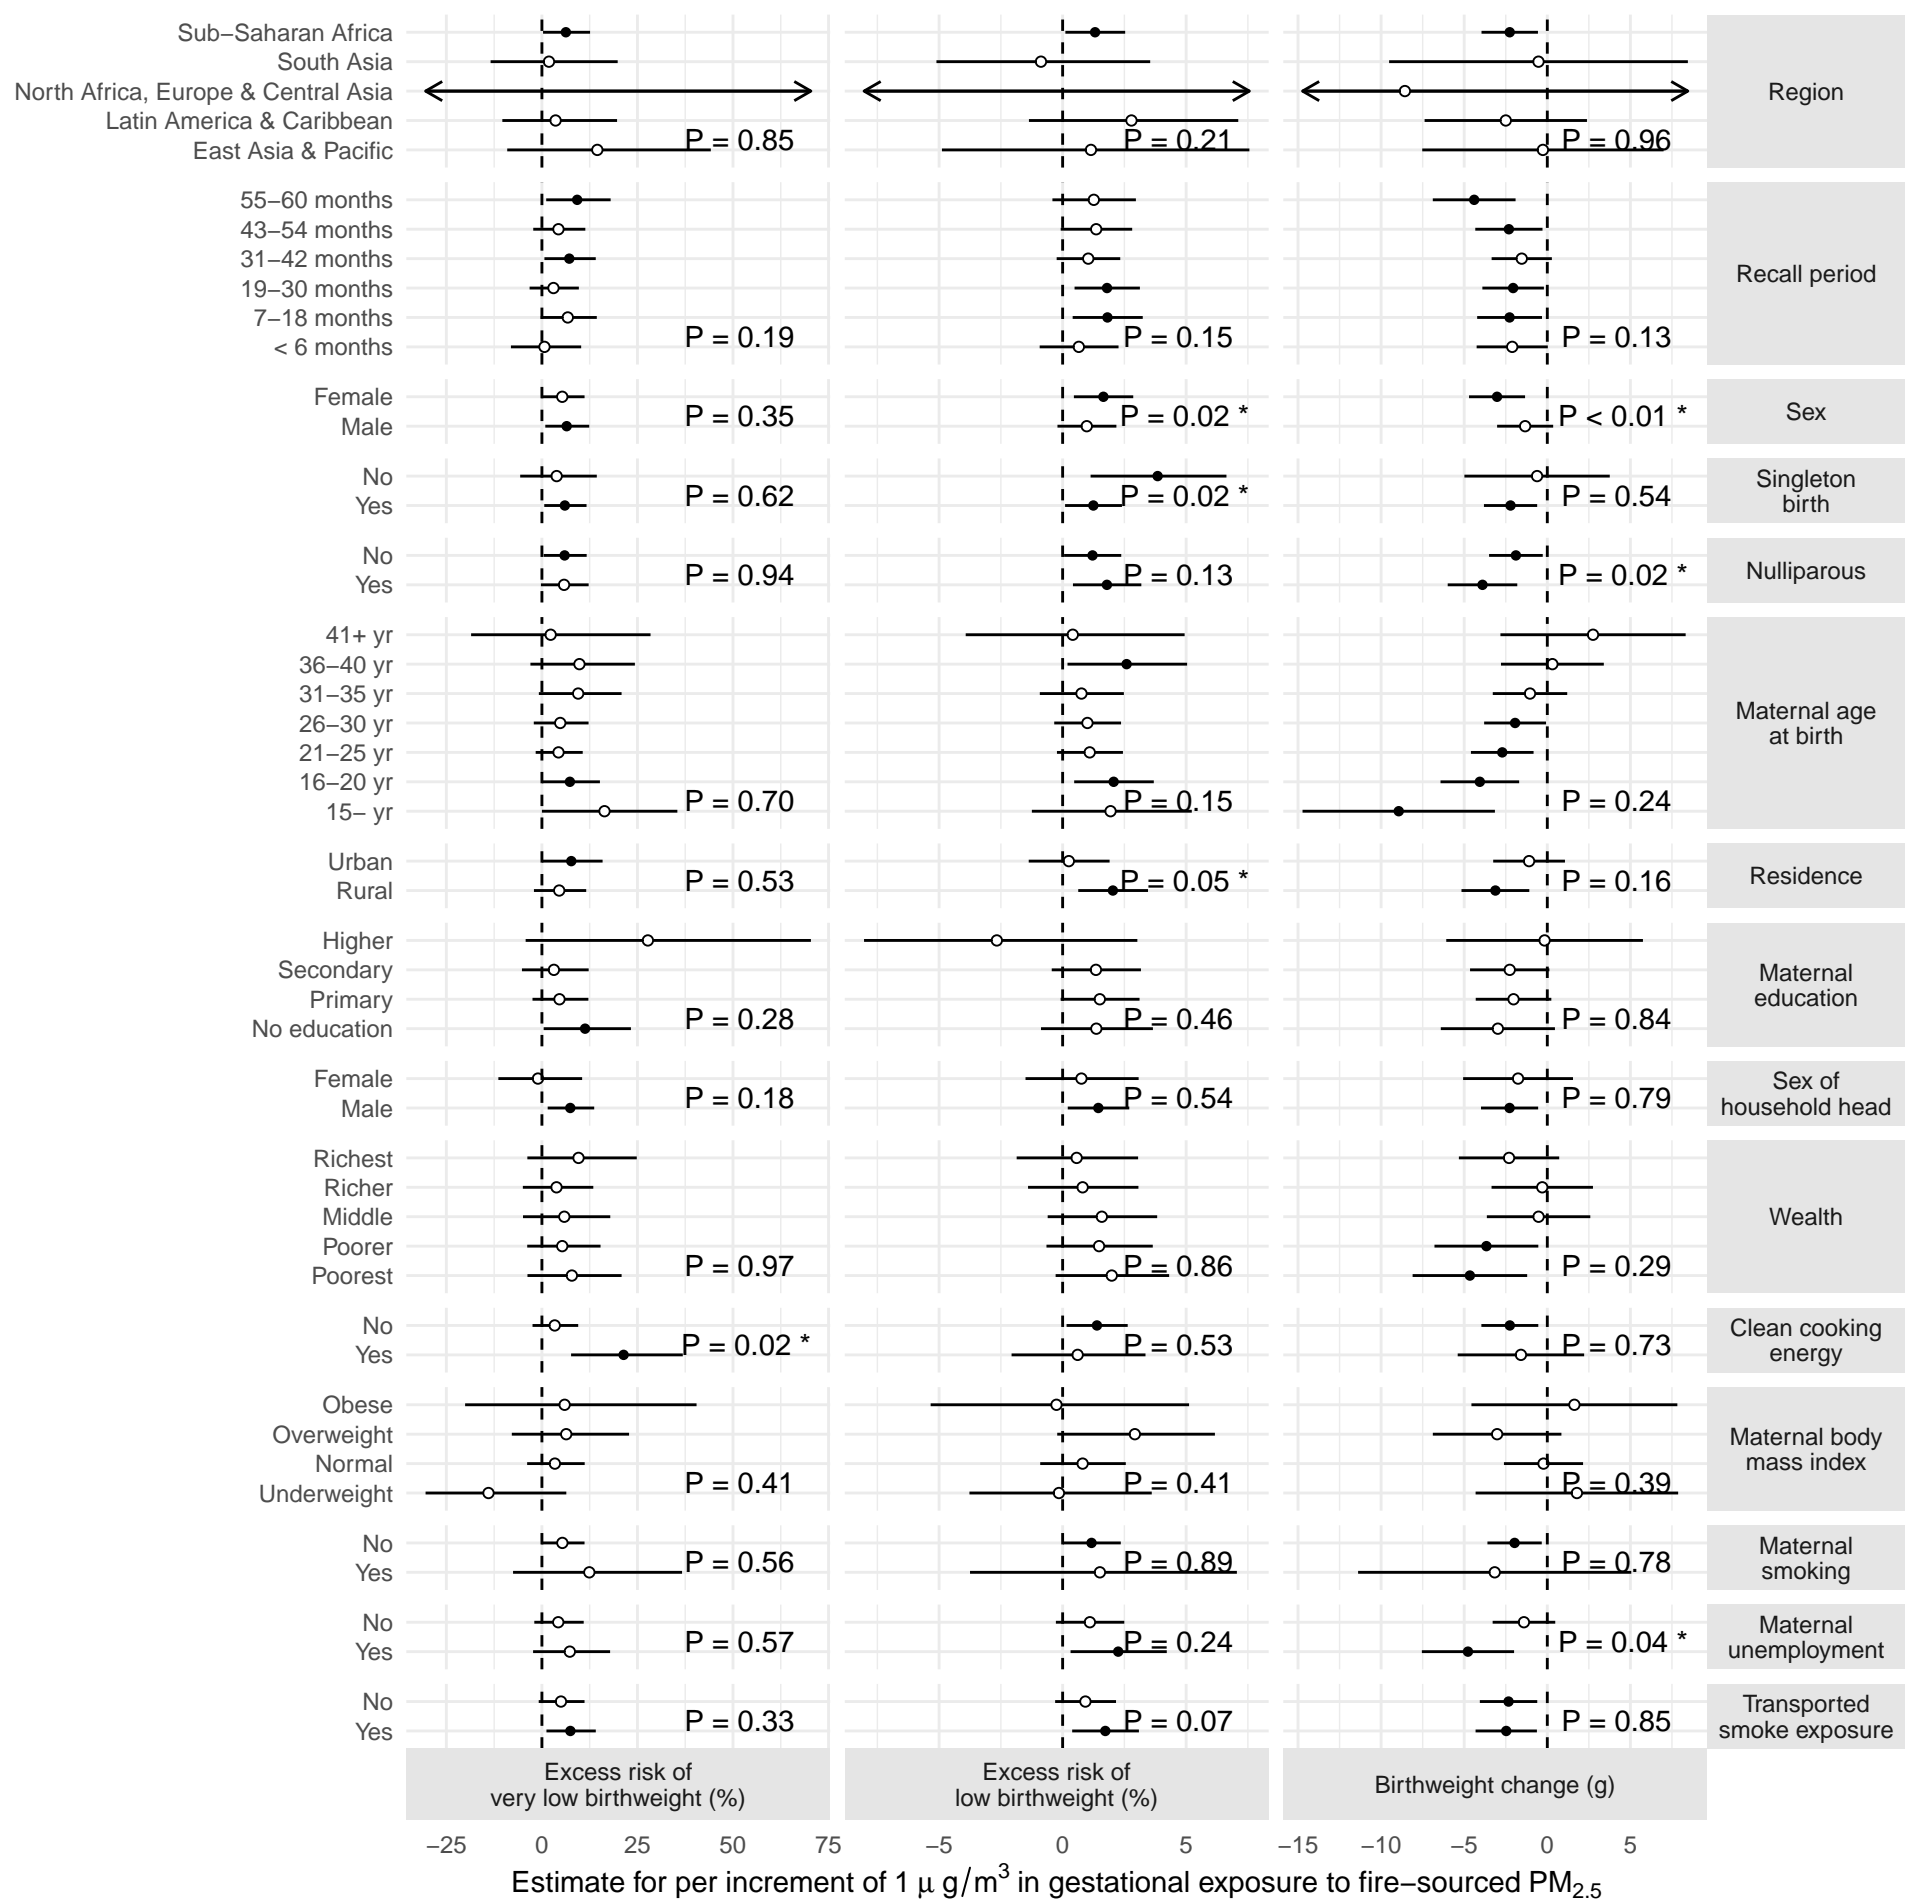

Supplement: supp [file elife-69298-supp-v1.zip › elife_poa_e69298_Figure_2_figure_supplement_3.pdf]

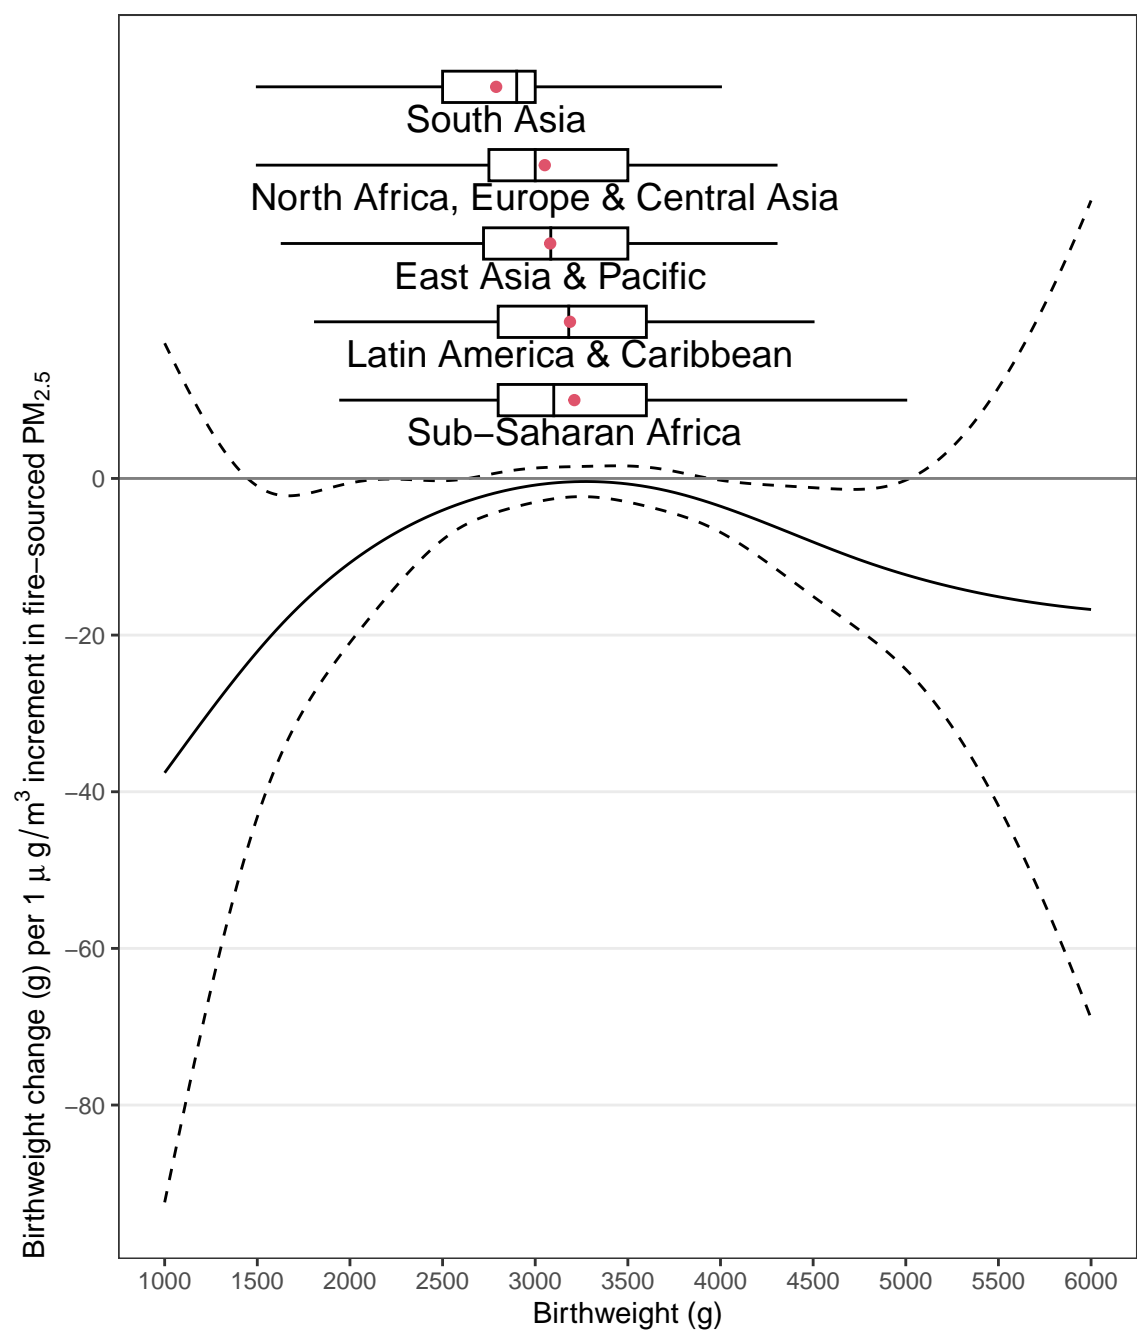

Supplement: supp [file elife-69298-supp-v1.zip › elife_poa_e69298_Figure_4_figure_supplement_1.pdf]
